# Supplementary material
Source: PubMed Central journal article supplement (PMC10155322)
Supplement: 12889_2023_15757_MOESM1_ESM.pdf [file 12889_2023_15757_MOESM1_ESM.pdf]

## Heat Action Survey

Please complete the survey below. Thank you!

What is the name of your jurisdiction?

---

What agency or agencies have contributed to the responses in this survey?

---

Within your jurisdiction, what is the name of the lead agency responsible for heat response?

---

Does this agency also oversee heat response for any other jurisdictions?

- Yes  
 No

If yes, please list jurisdictions.

---

### Jurisdiction's approach to excessive heat:

Is heat one of the hazards identified in your jurisdiction's all-hazards plan?

- Yes  
 No  
 Not sure

Has your jurisdiction conducted a needs assessment or related activity regarding heat in the last five years?

- Yes  
 No  
 Not sure

Is your jurisdiction currently addressing the health risks of heat with specific programming (for example, education and outreach, early warnings, risk reduction interventions, surveillance, or other specific activities)? Note: if your jurisdiction has a heat action plan, please check yes.

- Yes  
 No

Does your jurisdiction have plans to develop heat programming?

- Yes  
 No

What have been the barriers to developing heat programming in your jurisdiction? (Check all that apply)

- Budget  
 Staff time  
 Lack of heat hazard in our area  
 Competing hazard priorities  
 Competing programmatic priorities  
 Other  
 No barriers

Does your jurisdiction have a written heat action plan, policy, or procedure?

- Yes  
 No

---

Please upload any relevant documents here, or email to [heataction@uw.edu](mailto:heataction@uw.edu). We appreciate that some plans are confidential, and will keep the plan close-hold/not for further distribution upon request. In addition, we will not attribute any information contained in your plan to your jurisdiction in publicly facing papers, reports, or presentations if the plan is confidential.

---

Is your plan publicly available?

- Yes
  - No, the plan is confidential. Please do not share its contents beyond the study team or attribute any information contained in the plan to my jurisdiction in publicly facing papers, reports, or presentations.
  - Other
- 

If other, please describe.

---

What jurisdiction(s) are served by this heat action plan?

---

Does the health department have specific roles and responses outlined in the heat action plan?

- Yes
  - No
  - Not sure
- 

What year did your jurisdiction first implement its plan/policy/procedure?

---

When was the plan/policy/procedure last updated? (N/A if plan has not been updated)

---

What were the major updates, if any?

---

Is your plan/policy/procedure standalone (i.e. focused on heat) or part of an all-hazards plan?

- Standalone
  - Part of an all-hazards plan
  - Both
  - Not sure
- 

Does your heat action plan/policy/procedure capture all activities related to heat in your jurisdiction?

- Yes
  - No
  - Not sure
- 

If no, please describe additional items that are not included in the policy:

---

**What activities does your plan call for? Please check all that apply.**

|                                                                      | Ongoing during the summer | Only during extreme heat events |
|----------------------------------------------------------------------|---------------------------|---------------------------------|
| Education regarding dangers associated with heat                     | <input type="checkbox"/>  | <input type="checkbox"/>        |
| Support for organizations providing services to reduce heat risks    | <input type="checkbox"/>  | <input type="checkbox"/>        |
| Linkage of vulnerable populations with services to reduce heat risks | <input type="checkbox"/>  | <input type="checkbox"/>        |
| Direct services to reduce heat risks in vulnerable populations       | <input type="checkbox"/>  | <input type="checkbox"/>        |
| Surveillance of heat-related morbidity and mortality                 | <input type="checkbox"/>  | <input type="checkbox"/>        |
| Evaluation of heat-related communication and programming             | <input type="checkbox"/>  | <input type="checkbox"/>        |
| Interagency coordination regarding heat programming                  | <input type="checkbox"/>  | <input type="checkbox"/>        |
| Extended public park or public pool hours                            | <input type="checkbox"/>  | <input type="checkbox"/>        |
| Coordination with physicians/healthcare providers                    | <input type="checkbox"/>  | <input type="checkbox"/>        |
| Other                                                                | <input type="checkbox"/>  | <input type="checkbox"/>        |

If other, please describe \_\_\_\_\_

In the jurisdiction(s) covered by the plan, are cooling centers established during extreme heat events?  Yes  No  Not sure

Are the cooling centers formal (established and maintained by heat response programming) or informal (established and maintained by community partners with no government oversight)?  Formal  Informal  Not sure  Both

Does your jurisdiction provide transportation to cooling centers?  Yes  No  Not sure

What are the approximate hours of the cooling centers during heat events?  Daytime hours  Overnight hours  24 hours  Other

If other, please describe. \_\_\_\_\_

Do you collect information on the number of people who utilize cooling centers?

Yes  
 No  
 Not sure

What factors do you consider when determining where to place cooling centers?

---

Are your heat activities funded through your general funds or through a grant process that requires regular renewal?

General funds  
 Grant or other process requiring renewal  
 Not sure

What is/are the prompt(s) for activating extreme heat event-based activities? Please check all that apply.

NWS communication  
 Pre-defined trigger from heat early warning system  
 Directive or decision from the state health department  
 Internal decision  
 Change in syndromic or other surveillance data trends  
 Other, please specify  
 N/A, we have ongoing programming only

If other, please specify.

---

Does your jurisdiction use the National Incident Management System (NIMS) or other incident management structure for any of its heat activity?

Yes  
 No  
 Not sure

### Jurisdiction's communication about extreme heat:

Does your jurisdiction issue communications about extreme heat?

Yes  
 No

When do you and/or your partners issue communications about heat? Please check all that apply.

At the beginning of the summer  
 In advance of a forecasted extreme heat event  
 During an extreme heat event

Are any communications about heat made in multiple languages?

Yes  
 No  
 Not sure

What platforms are used to communicate heat warnings? Please check all that apply.

Social media  
 News alerts  
 Internet (for department, city, etc.)  
 Press conferences led by health department  
 Joint events with other groups  
 Text alert system  
 Phone alert system  
 Flyers and posters  
 Email messages  
 Telephone hotlines  
 Door-to-door campaigns  
 Other

If other, please specify

---

---

Are these communications targeted directly to individuals in specific at-risk populations? For example, directly contacting people in a registry.

Yes  
 No  
 Not sure

---

Are any heat warnings made in multiple languages?

Yes  
 No  
 Not sure

---

**The definition of excessive heat:**

---

Does your jurisdiction have a working definition for dangerous heat, a heatwave, or an extreme heat event?

Yes  
 No  
 Not sure

---

Please include your definition(s) here.

\_\_\_\_\_

---

What is the source of the definition?

NOAA/NWS  
 State-wide definition  
 City or county definition  
 Other

---

If other, please specify.

\_\_\_\_\_

---

Does the definition incorporate any measures of humidity?

Yes  
 No  
 Not sure

---

Does your definition include one more threshold(s) for temperature or related variables?

One threshold  
 Multiple thresholds  
 Not sure

---

Please describe the threshold(s) your jurisdiction uses.

\_\_\_\_\_

---

Please describe the different levels of activities your jurisdiction engages in at the different thresholds.

\_\_\_\_\_

---

**Coordination with meteorological agencies:**

---

Does your jurisdiction receive meteorological data from the National Weather Service?

Yes  
 No  
 Not sure

---

Does your jurisdiction receive meteorological data from other sources?

Yes  
 No  
 Not sure

---

Do you receive raw data, interpretations, or both?

Raw data  
 Interpretations  
 Both

---

How do heat event-specific health promotion activities within your heat action plan get activated?

- Automatically based on NWS excessive heat warning
- Automatically based on NWS heat advisories
- Automatically based on either NWS excessive heat warnings or heat advisories
- Neither automatically based on NWS excessive heat warnings or heat advisories

If neither, please explain how activities are activated:

\_\_\_\_\_

Please describe any circumstances in which this might occur:

\_\_\_\_\_

**Outdoor event cancellation**

Does your jurisdiction have an extreme heat outdoor event modification/delay/cancellation policy?

- Yes
- No
- Not sure

**Cascading failures/Utilities**

Does your jurisdiction's heat plan, policy, or procedure have provisions for power outages during a heat event (for example, relocation assistance or sheltering)?

- Yes
- No
- Not sure
- We do not have an excessive heat plan

Does your jurisdiction institute a moratorium on disconnecting utilities during heat events?

- Yes
- No
- Not sure

Does your jurisdiction institute a moratorium on disconnecting utilities during the summer?

- Yes
- No
- Not sure

Does your jurisdiction's heat plan include provisions to increase access to personal fans/air conditioners?

- Yes
- No
- Not sure
- We do not have an excessive heat plan

Does your jurisdiction's heat plan include provisions for helping people pay their utility bills or other forms of heat-related energy assistance?

- Yes
- No
- Not sure
- We do not have an excessive heat plan

How is this financial support provided? Check all that apply.

- Fuel assistance program funds
- Private donations
- Government funds
- Other

If other, please describe.

\_\_\_\_\_

## Vulnerable Populations and Equity

Does your jurisdiction's heat plan have specific communications or response activities for at-risk or vulnerable populations?

- Yes  
 No  
 Not sure  
 We do not have an excessive heat plan

What populations are targeted? Check all that apply

- Athletes  
 Elderly  
 People with pre-existing medical conditions  
 People with low incomes  
 Mobility challenged  
 People living in high-rise apartment buildings  
 Children  
 People working outdoors  
 People who live alone  
 Communities of color  
 People without air conditioning  
 People who are experiencing homelessness  
 Tourists  
 Non-English speakers  
 Undocumented people  
 Other

If other, please describe.

---

Has a heat vulnerability map been developed for your jurisdiction?

- Yes  
 No  
 Not sure

How is that map used in your heat plan, policy, or procedure, and response efforts?

---

Does your jurisdictions provide extended sheltering for people who are experiencing homelessness during heat emergencies?

- Yes  
 No  
 Not sure

## Epidemiologic Surveillance

Does your jurisdiction have health surveillance activities related to heat?

- Yes  
 No  
 Not sure

What data sources are used to monitor the health impacts of excessive heat? Check all that apply.

- Hospital admissions  
 Emergency department visits  
 Social media  
 Emergency Medical Service use  
 Death certificates  
 Not sure  
 Other

If other, please describe.

---

What health outcomes are tracked? Check all that apply.

- All-cause mortality
- Heat-related illness (ex heat exhaustion, heat stroke)
- Cardiac admissions
- Respiratory admissions
- Renal admissions
- Cerebrovascular admissions
- Injuries
- Drownings
- Not sure
- Other

If other, please describe.

---

### Longer-Term Adaptation

Some jurisdictions are implementing long-term actions to adapt to excessive heat. Please check any of the actions below that your jurisdiction is undertaking.

- Green roofs
- Cool pavements
- Tree planing/increased green space
- A law/regulation governing maximum permissible temperature for residential buildings
- A law/regulation banning landlords from charging extra for tenant use of air conditioning
- A law/regulation to allow tenants/homeowners to install air conditioning
- Not sure
- Other

If other, please describe.

---

### Program Evaluation

Does your jurisdiction formally evaluate its approach to excessive heat?

- Yes
- No
- Not sure

How frequently is an evaluation effort undertaken for your heat plan, policy, or procedure?

- After every heat event
- Every year
- Every 2-5 years
- Unsure
- Other

If other, please describe.

---



**COVID-19 and Extreme Heat**

Did you modify your approach to managing extreme heat because of COVID-19?  Yes  No

Did you approach to implementation change due to COVID-19 for any of the following activities? (Check all that apply)

- Education regarding dangers associated with heat
- Support for organizations providing services to reduce heat risks
- Linkage of vulnerable populations with services to reduce heat risks
- Direct services to reduce heat risks in vulnerable populations
- Surveillance of heat-related morbidity and mortality
- Evaluation of heat-related communication and programming
- Interagency coordination regarding heat programming
- Extended public park or public pool hours
- Coordination with physicians/healthcare providers
- Other (please describe)

If you selected any of the activities or "other", please describe how implementation changed.

\_\_\_\_\_

If your heat plan was modified due to COVID-19, please describe how.

\_\_\_\_\_

**Conclusion**

What priority is heat in your jurisdiction?  Low priority  Medium priority  High priority

What resources or sources of data do you need to better understand or evaluate the impact of heat in your community?

\_\_\_\_\_

As a token of our appreciation, we are offering participants who complete the survey copy of a climate change and/or public health-related book for their personal or organizational library (while supplies last). Book options include The Great Influenza by John M. Barry, The Unthinkable by Amanda Ripley, Five Days at Memorial by Sheri Fink, Heat Wave: A Social Autopsy of Disaster in Chicago by Eric Klinenberg, A Fire Story by Brian Fies, Fire in Paradise: An American Tragedy by Alastair Gee and Dani Anguiano, and The Ghost Map by Steven Johnson. If you are interested in receiving a book, please indicate your preferred book and include your complete shipping address. Please note that we are only accepting one survey submission per health department, and thus are only able to provide one book per participating health department.

\_\_\_\_\_

---

Would you be willing to participate in a follow-up interview to provide information about the implementation of your LHJ's heat response program or activities? If you would be willing to participate in a follow-up interview, please provide your email address.

---
